# Supplementary material for: Collagen overlays can inhibit leptin and adiponectin secretion but not lipid accumulation in adipocytes
Source: PeerJ. 2018 Apr 27;6:e4641. doi: 10.7717/peerj.4641 (PMC5926549; doi:10.7717/peerj.4641)
Supplement: Data S1 — Data from analysis of adipokines and TG are shown in the individual tabs. [file peerj-06-4641-s001.xlsx]

## Sheet: TG
Well	Experiment	Treatment	Collagen	Time	PlateType	TG mass/well (corr. for efficiency)
A1	90514	Cont	H	I/D	CellBIND	232.787
A2	90514	Col	H	I/D	CellBIND	168.439
A4	90514	Cont	P	I/D	CellBIND	223.324
A5	90514	Col	P	I/D	CellBIND	242.249
B1	90514	Cont	H	Ins	CellBIND	268.745
B2	90514	Col	H	Ins	CellBIND	130.588
B4	90514	Cont	P	Ins	CellBIND	224.544
B5	90514	Col	P	Ins	CellBIND	190.131
C1	90514	Cont	H	Ins2d	CellBIND	223.324
C2	90514	Col	H	Ins2d	CellBIND	196.828
C4	90514	Cont	P	Ins2d	CellBIND	253.605
C5	90514	Col	P	Ins2d	CellBIND	223.324
D1	90514	Neg	Neg	Neg	CellBIND	0
D2	90514	Pos	Pos	Pos	CellBIND	408.796
A1	0919 I	Cont	H	I/D	CellBIND	241.751
A2	0919 I	Col	H	I/D	CellBIND	144.676
A4	0919 I	Cont	P	I/D	CellBIND	181.528
A5	0919 I	Col	P	I/D	CellBIND	164.322
B1	0919 I	Cont	H	Ins	CellBIND	155.718
B2	0919 I	Col	H	Ins	CellBIND	95.4958
B4	0919 I	Cont	P	Ins	CellBIND	190.131
B6	0919 I	Col	P	Ins	CellBIND	191.852
C1	0919 I	Cont	H	Ins2d	CellBIND	171.204
C2	0919 I	Col	H	Ins2d	CellBIND	143.674
C4	0919 I	Cont	P	Ins2d	CellBIND	214.22
C5	0919 I	Col	P	Ins2d	CellBIND	212.5
D1	0919 I	Neg	Neg	Neg	CellBIND	7.7429
D2	0919 I	Pos	Pos	Pos	CellBIND	262.398
A1	091914II	Cont	H	I/D	Regular	243.471
A2	091914II	Col	H	I/D	Regular	136.791
A4	091914II	Cont	P	I/D	Regular	269.281
A5	091914II	Col	P	I/D	Regular	114.423
B1	091914II	Cont	H	Ins	Regular	207.338
B2	091914II	Col	H	Ins	Regular	119.585
B4	091914II	Cont	P	Ins	Regular	243.471
B5	091914II	Col	P	Ins	Regular	143.674
C1	091914II	Cont	H	Ins2d	Regular	252.074
C2	091914II	Col	H	Ins2d	Regular	164.322
C4	091914II	Cont	P	Ins2d	Regular	215.941
C5	091914II	Col	P	Ins2d	Regular	210.779
D1	091914II	Neg	Neg	Neg	Regular	12.9048
D2	091914II	Pos	Pos	Pos	Regular	265.84
A1	90814	Cont	H	I/D	CellBIND	250.537
A2	90814	Col	H	I/D	CellBIND	179.963
A4	90814	Cont	P	I/D	CellBIND	275.238
A5	90814	Col	P	I/D	CellBIND	52.1252
B1	90814	Cont	H	Ins	CellBIND	167.613
B2	90814	Col	H	Ins	CellBIND	144.676
B4	90814	Cont	P	Ins	CellBIND	292.881
B5	90814	Col	P	Ins	CellBIND	181.728
C1	90814	Cont	H	Ins2d	CellBIND	176.435
C2	90814	Col	H	Ins2d	CellBIND	185.256
C4	90814	Cont	P	Ins2d	CellBIND	200.593
C5	90814	Col	P	Ins2d	CellBIND	127.791
D3	90814	Neg	Neg	Neg	CellBIND	1.76435
D4	90814	Pos	Pos	Pos	CellBIND	274.281
A1	91214	Cont	H	I/D	CellBIND	211.721
A3	91214	Cont	P	I/D	CellBIND	166.206
A4	91214	Col	H	I/D	CellBIND	261.123
A6	91214	Col	P	I/D	CellBIND	218.589
B1	91214	Cont	H	Ins	CellBIND	197.318
B3	91214	Col	H	Ins	CellBIND	130.181
B4	91214	Cont	P	Ins	CellBIND	243.811
B6	91214	Col	P	Ins	CellBIND	121.994
C1	91214	Cont	H	Ins2d	CellBIND	158.057
C3	91214	Col	H	Ins2d	CellBIND	141.148
C4	91214	Cont	P	Ins2d	CellBIND	200.593
C6	91214	Col	P	Ins2d	CellBIND	190.549
D5	91214	Neg	Neg	Neg	CellBIND	15.1331
D6	91214	Pos	Pos	Pos	CellBIND	300.981
A1	101014	Cont	H	I/D	Regular	226.997
A2	101014	Col	H	I/D	Regular	117.702
A4	101014	Cont	P	I/D	Regular	146.287
A5	101014	Col	P	I/D	Regular	144.918
B1	101014	Cont	H	Ins	Regular	120.356
B2	101014	Col	H	Ins	Regular	0
B4	101014	Cont	P	Ins	Regular	179.306
B5	101014	Col	P	Ins	Regular	123.631
C1	101014	Cont	H	Ins2d	Regular	95.7936
C2	101014	Col	H	Ins2d	Regular	67.9561
C4	101014	Cont	P	Ins2d	Regular	159.738
C5	101014	Col	P	Ins2d	Regular	66.3186
D3	101014	Neg	Neg	Neg	Regular	3.36291
D4	101014	Pos	Pos	Pos	Regular	191.686
A1	101614	Cont	H	I/D	Regular	242.13
A2	101614	Col	H	I/D	Regular	105.619
A4	101614	Cont	P	I/D	Regular	112.169
A5	101614	Col	P	I/D	Regular	195.681
B1	101614	Cont	H	Ins	Regular	161.293
B2	101614	Col	H	Ins	Regular	92.4801
B4	101614	Cont	P	Ins	Regular	153.013
B5	101614	Col	P	Ins	Regular	139.561
C1	101614	Cont	H	Ins2d	Regular	124.428
C2	101614	Col	H	Ins2d	Regular	95.843
C4	101614	Cont	P	Ins2d	Regular	147.968
C5	101614	Col	P	Ins2d	Regular	134.517
D5	101614	Neg	Neg	Neg	Regular	97.4311
D6	101614	Pos	Pos	Pos	Regular	149.831

## Sheet: Leptin
Expt	PlateType	Treatment +/- collagen	Collagen Type	Time added	Day Sampled	Leptin.pg.mL	Leptin_Rel_Pos	Leptin.adjust.low	Ln.leptin
90514	CellBind	Cont	H	I/D	9	NA	#VALUE!	2	0.693147
90514	CellBind	Col	H	I/D	9	NA	#VALUE!	2	0.693147
90514	CellBind	Col	H	I/D	9	NA	#VALUE!	2	0.693147
90514	CellBind	Cont	P	I/D	9	NA	#VALUE!	2	0.693147
90514	CellBind	Col	P	I/D	9	NA	#VALUE!	2	0.693147
90514	CellBind	Col	P	I/D	9	NA	#VALUE!	2	0.693147
90514	CellBind	Cont	H	Ins	9	NA	#VALUE!	2	0.693147
90514	CellBind	Col	H	Ins	9	NA	#VALUE!	2	0.693147
90514	CellBind	Col	H	Ins	9	NA	#VALUE!	2	0.693147
90514	CellBind	Cont	P	Ins	9	NA	#VALUE!	2	0.693147
90514	CellBind	Col	P	Ins	9	NA	#VALUE!	2	0.693147
90514	CellBind	Col	P	Ins	9	NA	#VALUE!	2	0.693147
90514	CellBind	Cont	H	Ins2d	9	NA	#VALUE!	2	0.693147
90514	CellBind	Col	H	Ins2d	9	NA	#VALUE!	2	0.693147
90514	CellBind	Col	H	Ins2d	9	NA	#VALUE!	2	0.693147
90514	CellBind	Cont	P	Ins2d	9	NA	#VALUE!	2	0.693147
90514	CellBind	Col	P	Ins2d	9	NA	#VALUE!	2	0.693147
90514	CellBind	Col	P	Ins2d	9	NA	#VALUE!	2	0.693147
90514	CellBind	Neg	Neg	Neg	9	NA	#VALUE!	2	0.693147
90514	CellBind	Pos	Pos	Pos	9	348.035	1	348.035	5.8523
90514	CellBind	Cont	H	I/D	12	340.918	0.215321	340.918	5.83164
90514	CellBind	Col	H	I/D	12	NA	#VALUE!	2	0.693147
90514	CellBind	Col	H	I/D	12	NA	#VALUE!	2	0.693147
90514	CellBind	Cont	P	I/D	12	260.608	0.164598	260.608	5.56302
90514	CellBind	Col	P	I/D	12	NA	#VALUE!	2	0.693147
90514	CellBind	Col	P	I/D	12	NA	#VALUE!	2	0.693147
90514	CellBind	Cont	H	Ins	12	1147.75	0.724908	1147.75	7.04556
90514	CellBind	Col	H	Ins	12	NA	#VALUE!	2	0.693147
90514	CellBind	Col	H	Ins	12	NA	#VALUE!	2	0.693147
90514	CellBind	Cont	P	Ins	12	603.366	0.381081	603.366	6.40252
90514	CellBind	Col	P	Ins	12	213.94	0.135123	213.94	5.3657
90514	CellBind	Col	P	Ins	12	363.323	0.229472	363.323	5.89529
90514	CellBind	Cont	H	Ins2d	12	819.997	0.517903	819.997	6.7093
90514	CellBind	Col	H	Ins2d	12	482.879	0.304982	482.879	6.17977
90514	CellBind	Col	H	Ins2d	12	465.284	0.29387	465.284	6.14265
90514	CellBind	Cont	P	Ins2d	12	1151.08	0.727011	1151.08	7.04845
90514	CellBind	Col	P	Ins2d	12	1231.85	0.778028	1231.85	7.11627
90514	CellBind	Col	P	Ins2d	12	702.461	0.443669	702.461	6.55459
90514	CellBind	Neg	Neg	Neg	12	NA	#VALUE!	2	0.693147
90514	CellBind	Pos	Pos	Pos	12	1583.3	1	1583.3	7.36727
90814	CellBind	Cont	H	I/D	9	NA	#VALUE!	2	0.693147
90814	CellBind	Col	H	I/D	9	NA	#VALUE!	2	0.693147
90814	CellBind	Col	H	I/D	9	NA	#VALUE!	2	0.693147
90814	CellBind	Cont	P	I/D	9	NA	#VALUE!	2	0.693147
90814	CellBind	Col	P	I/D	9	NA	#VALUE!	2	0.693147
90814	CellBind	Col	P	I/D	9	NA	#VALUE!	2	0.693147
90814	CellBind	Cont	H	Ins	9	NA	#VALUE!	2	0.693147
90814	CellBind	Col	H	Ins	9	NA	#VALUE!	2	0.693147
90814	CellBind	Col	H	Ins	9	NA	#VALUE!	2	0.693147
90814	CellBind	Cont	P	Ins	9	NA	#VALUE!	2	0.693147
90814	CellBind	Col	P	Ins	9	NA	#VALUE!	2	0.693147
90814	CellBind	Col	P	Ins	9	NA	#VALUE!	2	0.693147
90814	CellBind	Cont	H	Ins2d	9	NA	#VALUE!	2	0.693147
90814	CellBind	Col	H	Ins2d	9	NA	#VALUE!	2	0.693147
90814	CellBind	Col	H	Ins2d	9	NA	#VALUE!	2	0.693147
90814	CellBind	Cont	P	Ins2d	9	154.396	0.574537	154.396	5.03952
90814	CellBind	Col	P	Ins2d	9	NA	#VALUE!	2	0.693147
90814	CellBind	Col	P	Ins2d	9	NA	#VALUE!	2	0.693147
90814	CellBind	Neg	Neg	Neg	9	NA	#VALUE!	2	0.693147
90814	CellBind	Pos	Pos	Pos	9	268.731	1	268.731	5.59371
90814	CellBind	Cont	H	I/D	12	NA	#VALUE!	2	0.693147
90814	CellBind	Col	H	I/D	12	NA	#VALUE!	2	0.693147
90814	CellBind	Col	H	I/D	12	NA	#VALUE!	2	0.693147
90814	CellBind	Cont	P	I/D	12	NA	#VALUE!	2	0.693147
90814	CellBind	Col	P	I/D	12	NA	#VALUE!	2	0.693147
90814	CellBind	Col	P	I/D	12	NA	#VALUE!	2	0.693147
90814	CellBind	Cont	H	Ins	12	NA	#VALUE!	2	0.693147
90814	CellBind	Col	H	Ins	12	NA	#VALUE!	2	0.693147
90814	CellBind	Col	H	Ins	12	NA	#VALUE!	2	0.693147
90814	CellBind	Cont	P	Ins	12	59.5391	0.044459	59.5391	4.08663
90814	CellBind	Col	P	Ins	12	NA	#VALUE!	2	0.693147
90814	CellBind	Col	P	Ins	12	NA	#VALUE!	2	0.693147
90814	CellBind	Cont	H	Ins2d	12	257.794	0.1925	257.794	5.55216
90814	CellBind	Col	H	Ins2d	12	158.427	0.118301	158.427	5.0653
90814	CellBind	Col	H	Ins2d	12	302.242	0.22569	302.242	5.71123
90814	CellBind	Cont	P	Ins2d	12	667.007	0.498068	667.007	6.5028
90814	CellBind	Col	P	Ins2d	12	327.335	0.244428	327.335	5.79098
90814	CellBind	Col	P	Ins2d	12	463.71	0.346261	463.71	6.13926
90814	CellBind	Neg	Neg	Neg	12	NA	#VALUE!	2	0.693147
90814	CellBind	Pos	Pos	Pos	12	1339.19	1	1339.19	7.19982
101014	Regular	Cont	H	I/D	9	66.0884	0.108944	66.0884	4.19099
101014	Regular	Col	H	I/D	9	NA	#VALUE!	2	0.693147
101014	Regular	Col	H	I/D	9	NA	#VALUE!	2	0.693147
101014	Regular	Cont	P	I/D	9	59.9314	0.0987947	59.9314	4.0932
101014	Regular	Col	P	I/D	9	NA	#VALUE!	2	0.693147
101014	Regular	Col	P	I/D	9	NA	#VALUE!	2	0.693147
101014	Regular	Cont	H	Ins	9	NA	#VALUE!	2	0.693147
101014	Regular	Col	H	Ins	9	NA	#VALUE!	2	0.693147
101014	Regular	Col	H	Ins	9	NA	#VALUE!	2	0.693147
101014	Regular	Cont	P	Ins	9	142.872	0.23552	142.872	4.96195
101014	Regular	Col	P	Ins	9	NA	#VALUE!	2	0.693147
101014	Regular	Col	P	Ins	9	NA	#VALUE!	2	0.693147
101014	Regular	Cont	H	Ins2d	9	NA	#VALUE!	2	0.693147
101014	Regular	Col	H	Ins2d	9	NA	#VALUE!	2	0.693147
101014	Regular	Col	H	Ins2d	9	NA	#VALUE!	2	0.693147
101014	Regular	Cont	P	Ins2d	9	276.27	0.45542	276.27	5.62138
101014	Regular	Col	P	Ins2d	9	243.184	0.40088	243.184	5.49382
101014	Regular	Col	P	Ins2d	9	196.299	0.323592	196.299	5.27964
101014	Regular	Neg	Neg	Neg	9	NA	#VALUE!	2	0.693147
101014	Regular	Pos	Pos	Pos	9	606.626	1	606.626	6.40791
101014	Regular	Cont	H	I/D	12	662.629	0.208507	662.629	6.49622
101014	Regular	Col	H	I/D	12	NA	#VALUE!	2	0.693147
101014	Regular	Col	H	I/D	12	NA	#VALUE!	2	0.693147
101014	Regular	Cont	P	I/D	12	488.762	0.153797	488.762	6.19188
101014	Regular	Col	P	I/D	12	NA	#VALUE!	2	0.693147
101014	Regular	Col	P	I/D	12	NA	#VALUE!	2	0.693147
101014	Regular	Cont	H	Ins	12	626.156	0.19703	626.156	6.4396
101014	Regular	Col	H	Ins	12	NA	#VALUE!	2	0.693147
101014	Regular	Col	H	Ins	12	NA	#VALUE!	2	0.693147
101014	Regular	Cont	P	Ins	12	915.161	0.287971	915.161	6.8191
101014	Regular	Col	P	Ins	12	12.3928	0.00389959	12.3928	2.51711
101014	Regular	Col	P	Ins	12	92.5771	0.0291309	92.5771	4.52804
101014	Regular	Cont	H	Ins2d	12	684.814	0.215488	684.814	6.52915
101014	Regular	Col	H	Ins2d	12	293.384	0.092318	293.384	5.68148
101014	Regular	Col	H	Ins2d	12	225.6	0.0709887	225.6	5.41876
101014	Regular	Cont	P	Ins2d	12	1457.29	0.458559	1457.29	7.28433
101014	Regular	Col	P	Ins2d	12	1164.13	0.366313	1164.13	7.05973
101014	Regular	Col	P	Ins2d	12	1049.27	0.33017	1049.27	6.95585
101014	Regular	Neg	Neg	Neg	12	NA	#VALUE!	2	0.693147
101014	Regular	Pos	Pos	Pos	12	3177.97	1	3177.97	8.064
101614	Regular	Cont	H	I/D	9	190.431	0.195752	190.431	5.24929
101614	Regular	Col	H	I/D	9	NA	#VALUE!	2	0.693147
101614	Regular	Col	H	I/D	9	NA	#VALUE!	2	0.693147
101614	Regular	Cont	P	I/D	9	70.4361	0.0724043	70.4361	4.25471
101614	Regular	Col	P	I/D	9	NA	#VALUE!	2	0.693147
101614	Regular	Col	P	I/D	9	NA	#VALUE!	2	0.693147
101614	Regular	Cont	H	Ins	9	118.306	0.121612	118.306	4.77327
101614	Regular	Col	H	Ins	9	NA	#VALUE!	2	0.693147
101614	Regular	Col	H	Ins	9	NA	#VALUE!	2	0.693147
101614	Regular	Cont	P	Ins	9	337.475	0.346905	337.475	5.82149
101614	Regular	Col	P	Ins	9	NA	#VALUE!	2	0.693147
101614	Regular	Col	P	Ins	9	NA	#VALUE!	2	0.693147
101614	Regular	Cont	H	Ins2d	9	367.351	0.377616	367.351	5.90632
101614	Regular	Col	H	Ins2d	9	130.093	0.133729	130.093	4.86825
101614	Regular	Col	H	Ins2d	9	21.9888	0.0226032	21.9888	3.09053
101614	Regular	Cont	P	Ins2d	9	457.389	0.47017	457.389	6.12553
101614	Regular	Col	P	Ins2d	9	548.488	0.563814	548.488	6.30716
101614	Regular	Col	P	Ins2d	9	652.496	0.670729	652.496	6.4808
101614	Regular	Neg	Neg	Neg	9	NA	#VALUE!	2	0.693147
101614	Regular	Pos	Pos	Pos	9	972.816	1	972.816	6.8802
101614	Regular	Cont	H	I/D	12	539.842	0.16587	539.842	6.29128
101614	Regular	Col	H	I/D	12	NA	#VALUE!	2	0.693147
101614	Regular	Col	H	I/D	12	NA	#VALUE!	2	0.693147
101614	Regular	Cont	P	I/D	12	380.246	0.116833	380.246	5.94082
101614	Regular	Col	P	I/D	12	NA	#VALUE!	2	0.693147
101614	Regular	Col	P	I/D	12	NA	#VALUE!	2	0.693147
101614	Regular	Cont	H	Ins	12	582.335	0.178927	582.335	6.36705
101614	Regular	Col	H	Ins	12	NA	#VALUE!	2	0.693147
101614	Regular	Col	H	Ins	12	NA	#VALUE!	2	0.693147
101614	Regular	Cont	P	Ins	12	1010.1	0.31036	1010.1	6.9178
101614	Regular	Col	P	Ins	12	35.9506	0.0110461	35.9506	3.58215
101614	Regular	Col	P	Ins	12	25.8835	0.00795289	25.8835	3.25361
101614	Regular	Cont	H	Ins2d	12	906.427	0.278506	906.427	6.80951
101614	Regular	Col	H	Ins2d	12	583.885	0.179403	583.885	6.3697
101614	Regular	Col	H	Ins2d	12	531.225	0.163223	531.225	6.27519
101614	Regular	Cont	P	Ins2d	12	1782.66	0.547735	1782.66	7.48586
101614	Regular	Col	P	Ins2d	12	1817.41	0.558413	1817.41	7.50517
101614	Regular	Col	P	Ins2d	12	1588.95	0.488217	1588.95	7.37083
101614	Regular	Neg	Neg	Neg	12	NA	#VALUE!	2	0.693147
101614	Regular	Pos	Pos	Pos	12	3254.61	1	3254.61	8.08783
091914I	CellBind	Cont	H	I/D	9	NA	#VALUE!	2	0.693147
091914I	CellBind	Col	H	I/D	9	NA	#VALUE!	2	0.693147
091914I	CellBind	Col	H	I/D	9	NA	#VALUE!	2	0.693147
091914I	CellBind	Cont	P	I/D	9	NA	#VALUE!	2	0.693147
091914I	CellBind	Col	P	I/D	9	NA	#VALUE!	2	0.693147
091914I	CellBind	Col	P	I/D	9	NA	#VALUE!	2	0.693147
091914I	CellBind	Cont	H	Ins	9	NA	#VALUE!	2	0.693147
091914I	CellBind	Col	H	Ins	9	NA	#VALUE!	2	0.693147
091914I	CellBind	Col	H	Ins	9	NA	#VALUE!	2	0.693147
091914I	CellBind	Cont	P	Ins	9	NA	#VALUE!	2	0.693147
091914I	CellBind	Col	P	Ins	9	NA	#VALUE!	2	0.693147
091914I	CellBind	Col	P	Ins	9	NA	#VALUE!	2	0.693147
091914I	CellBind	Cont	H	Ins2d	9	NA	#VALUE!	2	0.693147
091914I	CellBind	Col	H	Ins2d	9	NA	#VALUE!	2	0.693147
091914I	CellBind	Col	H	Ins2d	9	NA	#VALUE!	2	0.693147
091914I	CellBind	Cont	P	Ins2d	9	NA	#VALUE!	2	0.693147
091914I	CellBind	Col	P	Ins2d	9	NA	#VALUE!	2	0.693147
091914I	CellBind	Col	P	Ins2d	9	NA	#VALUE!	2	0.693147
091914I	CellBind	Neg	Neg	Neg	9	NA	#VALUE!	2	0.693147
091914I	CellBind	Pos	Pos	Pos	9	396.602	1	396.602	5.98293
091914I	CellBind	Cont	H	I/D	12	NA	#VALUE!	2	0.693147
091914I	CellBind	Col	H	I/D	12	NA	#VALUE!	2	0.693147
091914I	CellBind	Col	H	I/D	12	NA	#VALUE!	2	0.693147
091914I	CellBind	Cont	P	I/D	12	NA	#VALUE!	2	0.693147
091914I	CellBind	Col	P	I/D	12	NA	#VALUE!	2	0.693147
091914I	CellBind	Col	P	I/D	12	NA	#VALUE!	2	0.693147
091914I	CellBind	Cont	H	Ins	12	157.737	0.100257	157.737	5.06093
091914I	CellBind	Col	H	Ins	12	NA	#VALUE!	2	0.693147
091914I	CellBind	Col	H	Ins	12	NA	#VALUE!	2	0.693147
091914I	CellBind	Cont	P	Ins	12	259.286	0.1648	259.286	5.55793
091914I	CellBind	Col	P	Ins	12	NA	#VALUE!	2	0.693147
091914I	CellBind	Col	P	Ins	12	NA	#VALUE!	2	0.693147
091914I	CellBind	Cont	H	Ins2d	12	312.107	0.198373	312.107	5.74335
091914I	CellBind	Col	H	Ins2d	12	172.092	0.109381	172.092	5.14803
091914I	CellBind	Col	H	Ins2d	12	188.14	0.119581	188.14	5.23719
091914I	CellBind	Cont	P	Ins2d	12	737.33	0.468642	737.33	6.60304
091914I	CellBind	Col	P	Ins2d	12	690.588	0.438933	690.588	6.53754
091914I	CellBind	Col	P	Ins2d	12	734.563	0.466884	734.563	6.59928
091914I	CellBind	Neg	Neg	Neg	12	NA	#VALUE!	2	0.693147
091914I	CellBind	Pos	Pos	Pos	12	1573.33	1	1573.33	7.36095
091914II	Regular	Cont	H	I/D	9	NA	#VALUE!	2	0.693147
091914II	Regular	Col	H	I/D	9	NA	#VALUE!	2	0.693147
091914II	Regular	Col	H	I/D	9	NA	#VALUE!	2	0.693147
091914II	Regular	Cont	P	I/D	9	NA	#VALUE!	2	0.693147
091914II	Regular	Col	P	I/D	9	NA	#VALUE!	2	0.693147
091914II	Regular	Col	P	I/D	9	NA	#VALUE!	2	0.693147
091914II	Regular	Cont	H	Ins	9	NA	#VALUE!	2	0.693147
091914II	Regular	Col	H	Ins	9	NA	#VALUE!	2	0.693147
091914II	Regular	Col	H	Ins	9	NA	#VALUE!	2	0.693147
091914II	Regular	Cont	P	Ins	9	8.94862	0.0322642	8.94862	2.1915
091914II	Regular	Col	P	Ins	9	NA	#VALUE!	2	0.693147
091914II	Regular	Col	P	Ins	9	NA	#VALUE!	2	0.693147
091914II	Regular	Cont	H	Ins2d	9	380.741	1.37276	380.741	5.94212
091914II	Regular	Col	H	Ins2d	9	NA	#VALUE!	2	0.693147
091914II	Regular	Col	H	Ins2d	9	NA	#VALUE!	2	0.693147
091914II	Regular	Cont	P	Ins2d	9	94.9686	0.342409	94.9686	4.55355
091914II	Regular	Col	P	Ins2d	9	68.2321	0.24601	68.2321	4.22291
091914II	Regular	Col	P	Ins2d	9	51.9011	0.187129	51.9011	3.94934
091914II	Regular	Neg	Neg	Neg	9	NA	#VALUE!	2	0.693147
091914II	Regular	Pos	Pos	Pos	9	277.354	1	277.354	5.6253
091914II	Regular	Cont	H	I/D	12	NA	#VALUE!	2	0.693147
091914II	Regular	Col	H	I/D	12	NA	#VALUE!	2	0.693147
091914II	Regular	Col	H	I/D	12	NA	#VALUE!	2	0.693147
091914II	Regular	Cont	P	I/D	12	NA	#VALUE!	2	0.693147
091914II	Regular	Col	P	I/D	12	NA	#VALUE!	2	0.693147
091914II	Regular	Col	P	I/D	12	NA	#VALUE!	2	0.693147
091914II	Regular	Cont	H	Ins	12	260.511	0.174372	260.511	5.56264
091914II	Regular	Col	H	Ins	12	NA	#VALUE!	2	0.693147
091914II	Regular	Col	H	Ins	12	NA	#VALUE!	2	0.693147
091914II	Regular	Cont	P	Ins	12	279.605	0.187152	279.605	5.63338
091914II	Regular	Col	P	Ins	12	NA	#VALUE!	2	0.693147
091914II	Regular	Col	P	Ins	12	NA	#VALUE!	2	0.693147
091914II	Regular	Cont	H	Ins2d	12	2564.62	1.71662	2564.62	7.84957
091914II	Regular	Col	H	Ins2d	12	274.731	0.18389	274.731	5.61579
091914II	Regular	Col	H	Ins2d	12	124.161	0.0831066	124.161	4.82158
091914II	Regular	Cont	P	Ins2d	12	673.407	0.450743	673.407	6.51235
091914II	Regular	Col	P	Ins2d	12	426.305	0.285346	426.305	6.05515
091914II	Regular	Col	P	Ins2d	12	336.267	0.225079	336.267	5.8179
091914II	Regular	Neg	Neg	Neg	12	NA	#VALUE!	2	0.693147
091914II	Regular	Pos	Pos	Pos	12	1493.99	1	1493.99	7.30921
91214	CellBind	Cont	H	I/D	9	NA	#VALUE!	2	0.693147
91214	CellBind	Col	H	I/D	9	NA	#VALUE!	2	0.693147
91214	CellBind	Col	H	I/D	9	NA	#VALUE!	2	0.693147
91214	CellBind	Cont	P	I/D	9	NA	#VALUE!	2	0.693147
91214	CellBind	Col	P	I/D	9	NA	#VALUE!	2	0.693147
91214	CellBind	Col	P	I/D	9	NA	#VALUE!	2	0.693147
91214	CellBind	Cont	H	Ins	9	NA	#VALUE!	2	0.693147
91214	CellBind	Col	H	Ins	9	NA	#VALUE!	2	0.693147
91214	CellBind	Col	H	Ins	9	NA	#VALUE!	2	0.693147
91214	CellBind	Cont	P	Ins	9	22.2878	0.0703958	22.2878	3.10404
91214	CellBind	Col	P	Ins	9	NA	#VALUE!	2	0.693147
91214	CellBind	Col	P	Ins	9	NA	#VALUE!	2	0.693147
91214	CellBind	Cont	H	Ins2d	9	NA	#VALUE!	2	0.693147
91214	CellBind	Col	H	Ins2d	9	NA	#VALUE!	2	0.693147
91214	CellBind	Col	H	Ins2d	9	NA	#VALUE!	2	0.693147
91214	CellBind	Cont	P	Ins2d	9	90.5638	0.286045	90.5638	4.50605
91214	CellBind	Col	P	Ins2d	9	NA	#VALUE!	2	0.693147
91214	CellBind	Col	P	Ins2d	9	NA	#VALUE!	2	0.693147
91214	CellBind	Neg	Neg	Neg	9	NA	#VALUE!	2	0.693147
91214	CellBind	Pos	Pos	Pos	9	316.607	1	316.607	5.75766
91214	CellBind	Cont	H	I/D	12	NA	#VALUE!	2	0.693147
91214	CellBind	Col	H	I/D	12	NA	#VALUE!	2	0.693147
91214	CellBind	Col	H	I/D	12	NA	#VALUE!	2	0.693147
91214	CellBind	Cont	P	I/D	12	NA	#VALUE!	2	0.693147
91214	CellBind	Col	P	I/D	12	NA	#VALUE!	2	0.693147
91214	CellBind	Col	P	I/D	12	NA	#VALUE!	2	0.693147
91214	CellBind	Cont	H	Ins	12	301.018	0.20788	301.018	5.70717
91214	CellBind	Col	H	Ins	12	NA	#VALUE!	2	0.693147
91214	CellBind	Col	H	Ins	12	NA	#VALUE!	2	0.693147
91214	CellBind	Cont	P	Ins	12	172.65	0.119231	172.65	5.15127
91214	CellBind	Col	P	Ins	12	NA	#VALUE!	2	0.693147
91214	CellBind	Col	P	Ins	12	NA	#VALUE!	2	0.693147
91214	CellBind	Cont	H	Ins2d	12	286.286	0.197706	286.286	5.65699
91214	CellBind	Col	H	Ins2d	12	61.4578	0.0424421	61.4578	4.11835
91214	CellBind	Col	H	Ins2d	12	264.326	0.182541	264.326	5.57718
91214	CellBind	Cont	P	Ins2d	12	542.634	0.374737	542.634	6.29643
91214	CellBind	Col	P	Ins2d	12	551.773	0.381048	551.773	6.31314
91214	CellBind	Col	P	Ins2d	12	568.74	0.392766	568.74	6.34342
91214	CellBind	Neg	Neg	Neg	12	NA	#VALUE!	2	0.693147
91214	CellBind	Pos	Pos	Pos	12	1448.04	1	1448.04	7.27796

## Sheet: Adiponectin
Expt	PlateType	Treatment +/- collagen	Collagen Type	Time added	Day Sampled	Adip.pg.mL	Adip_Rel_Pos	Adip.adjust.low	ln.adiponectin
091914I	CellBind	Cont	H	I/D	9	20251.2	0.118951	20251.2	9.91597
091914I	CellBind	Col	H	I/D	9	7058.44	0.0414599	7058.44	8.86198
091914I	CellBind	Col	H	I/D	9	11140.6	0.0654375	11140.6	9.31835
091914I	CellBind	Cont	P	I/D	9	29162.4	0.171294	29162.4	10.2806
091914I	CellBind	Col	P	I/D	9	8793.41	0.0516507	8793.41	9.08176
091914I	CellBind	Col	P	I/D	9	11140.6	0.0654375	11140.6	9.31835
091914I	CellBind	Cont	H	Ins	9	28189.3	0.165578	28189.3	10.2467
091914I	CellBind	Col	H	Ins	9	8502.68	0.049943	8502.68	9.04814
091914I	CellBind	Col	H	Ins	9	9084.75	0.053362	9084.75	9.11435
091914I	CellBind	Cont	P	Ins	9	43938.8	0.258088	43938.8	10.6906
091914I	CellBind	Col	P	Ins	9
091914I	CellBind	Col	P	Ins	9	16551	0.097217	16551	9.7142
091914I	CellBind	Cont	H	Ins2d	9	58207.5	0.341899	58207.5	10.9718
091914I	CellBind	Col	H	Ins2d	9	52761.4	0.30991	52761.4	10.8735
091914I	CellBind	Col	H	Ins2d	9	47782.1	0.280662	47782.1	10.7744
091914I	CellBind	Cont	P	Ins2d	9	57840.8	0.339745	57840.8	10.9654
091914I	CellBind	Col	P	Ins2d	9	68688.3	0.403462	68688.3	11.1373
091914I	CellBind	Col	P	Ins2d	9	82388.4	0.483933	82388.4	11.3192
091914I	CellBind	Neg	Neg	Neg	9	6199.77	0.0364162	6199.77	8.73227
091914I	CellBind	Pos	Pos	Pos	9	170248	1	170248	12.045
091914I	CellBind	Cont	H	I/D	12	72533.4	0.159164	72533.4	11.1918
091914I	CellBind	Col	H	I/D	12	24658.8	0.0541102	24658.8	10.1129
091914I	CellBind	Col	H	I/D	12	26577.2	0.0583199	26577.2	10.1878
091914I	CellBind	Cont	P	I/D	12	61159.7	0.134206	61159.7	11.0212
091914I	CellBind	Col	P	I/D	12	30139.8	0.0661376	30139.8	10.3136
091914I	CellBind	Col	P	I/D	12	41524.5	0.0911197	41524.5	10.634
091914I	CellBind	Cont	H	Ins	12	139778	0.306723	139778	11.8478
091914I	CellBind	Col	H	Ins	12	34759.3	0.0762743	34759.3	10.4562
091914I	CellBind	Col	H	Ins	12	24023.2	0.0527156	24023.2	10.0868
091914I	CellBind	Cont	P	Ins	12	159264	0.349482	159264	11.9783
091914I	CellBind	Col	P	Ins	12	1206.17	0.00264676	1206.17	7.0952
091914I	CellBind	Col	P	Ins	12	69070.4	0.151565	69070.4	11.1429
091914I	CellBind	Cont	H	Ins2d	12	160295	0.351744	160295	11.9848
091914I	CellBind	Col	H	Ins2d	12	146640	0.321782	146640	11.8957
091914I	CellBind	Col	H	Ins2d	12	129280	0.283688	129280	11.7697
091914I	CellBind	Cont	P	Ins2d	12	239258	0.525019	239258	12.3853
091914I	CellBind	Col	P	Ins2d	12	248368	0.545009	248368	12.4227
091914I	CellBind	Col	P	Ins2d	12	234783	0.515199	234783	12.3664
091914I	CellBind	Neg	Neg	Neg	12	1206.17	0.00264676	1206.17	7.0952
091914I	CellBind	Pos	Pos	Pos	12	455714	1	455714	13.0296
091914II	Regular	Cont	H	I/D	9	49127.4	0.460918	49127.4	10.8022
091914II	Regular	Col	H	I/D	9	NA	#VALUE!	2	0.693147
091914II	Regular	Col	H	I/D	9	NA	#VALUE!	2	0.693147
091914II	Regular	Cont	P	I/D	9	32197.2	0.302077	32197.2	10.3796
091914II	Regular	Col	P	I/D	9	NA	#VALUE!	2	0.693147
091914II	Regular	Col	P	I/D	9	NA	#VALUE!	2	0.693147
091914II	Regular	Cont	H	Ins	9	23368.4	0.219245	23368.4	10.0591
091914II	Regular	Col	H	Ins	9	NA	#VALUE!	2	0.693147
091914II	Regular	Col	H	Ins	9	NA	#VALUE!	2	0.693147
091914II	Regular	Cont	P	Ins	9	68745.8	0.64498	68745.8	11.1382
091914II	Regular	Col	P	Ins	9	NA	#VALUE!	2	0.693147
091914II	Regular	Col	P	Ins	9	NA	#VALUE!	2	0.693147
091914II	Regular	Cont	H	Ins2d	9	205062	1.92391	205062	12.2311
091914II	Regular	Col	H	Ins2d	9	20519.2	0.192513	20519.2	9.92912
091914II	Regular	Col	H	Ins2d	9	23368.4	0.219245	23368.4	10.0591
091914II	Regular	Cont	P	Ins2d	9	67203	0.630505	67203	11.1155
091914II	Regular	Col	P	Ins2d	9	32738	0.307151	32738	10.3963
091914II	Regular	Col	P	Ins2d	9	25611.9	0.240293	25611.9	10.1508
091914II	Regular	Neg	Neg	Neg	9	NA	#VALUE!	2	0.693147
091914II	Regular	Pos	Pos	Pos	9	106586	1	106586	11.5767
091914II	Regular	Cont	H	I/D	12	124671	0.0984744	124671	11.7334
091914II	Regular	Col	H	I/D	12	35962.5	0.0284059	35962.5	10.4902
091914II	Regular	Col	H	I/D	12	33277.8	0.0262853	33277.8	10.4126
091914II	Regular	Cont	P	I/D	12	248296	0.196123	248296	12.4224
091914II	Regular	Col	P	I/D	12	74917.7	0.0591756	74917.7	11.2241
091914II	Regular	Col	P	I/D	12	64630.9	0.0510504	64630.9	11.0764
091914II	Regular	Cont	H	Ins	12	264756	0.209124	264756	12.4866
091914II	Regular	Col	H	Ins	12	29476.3	0.0232826	29476.3	10.2913
091914II	Regular	Col	H	Ins	12	62572.1	0.0494242	62572.1	11.0441
091914II	Regular	Cont	P	Ins	12	234991	0.185614	234991	12.3673
091914II	Regular	Col	P	Ins	12	88847.9	0.0701787	88847.9	11.3947
091914II	Regular	Col	P	Ins	12	20519.2	0.0162076	20519.2	9.92912
091914II	Regular	Cont	H	Ins2d	12	418957	0.330923	418957	12.9455
091914II	Regular	Col	H	Ins2d	12	226532	0.178932	226532	12.3306
091914II	Regular	Col	H	Ins2d	12	145987	0.115312	145987	11.8913
091914II	Regular	Cont	P	Ins2d	12	480312	0.379387	480312	13.0822
091914II	Regular	Col	P	Ins2d	12	247622	0.19559	247622	12.4197
091914II	Regular	Col	P	Ins2d	12	259897	0.205286	259897	12.468
091914II	Regular	Neg	Neg	Neg	12	NA	#VALUE!	2	0.693147
091914II	Regular	Pos	Pos	Pos	12	1.26602e+06	1	1.26602e+06	14.0514
90814	CellBind	Cont	H	I/D	9	144432	0.877874	144432	11.8806
90814	CellBind	Col	H	I/D	9	28225.6	0.171559	28225.6	10.248
90814	CellBind	Col	H	I/D	9	38433.3	0.233602	38433.3	10.5567
90814	CellBind	Cont	P	I/D	9	114287	0.694654	114287	11.6465
90814	CellBind	Col	P	I/D	9	64317.5	0.39093	64317.5	11.0716
90814	CellBind	Col	P	I/D	9	58160.2	0.353505	58160.2	10.971
90814	CellBind	Cont	H	Ins	9	93071.5	0.565701	93071.5	11.4411
90814	CellBind	Col	H	Ins	9	26470	0.160888	26470	10.1838
90814	CellBind	Col	H	Ins	9	26470	0.160888	26470	10.1838
90814	CellBind	Cont	P	Ins	9	167665	1.01909	167665	12.0297
90814	CellBind	Col	P	Ins	9	53952.9	0.327933	53952.9	10.8959
90814	CellBind	Col	P	Ins	9	96696.9	0.587737	96696.9	11.4793
90814	CellBind	Cont	H	Ins2d	9	200601	1.21928	200601	12.2091
90814	CellBind	Col	H	Ins2d	9	73008.3	0.443754	73008.3	11.1983
90814	CellBind	Col	H	Ins2d	9	108330	0.658442	108330	11.5929
90814	CellBind	Cont	P	Ins2d	9	143839	0.874275	143839	11.8765
90814	CellBind	Col	P	Ins2d	9	61937.8	0.376466	61937.8	11.0339
90814	CellBind	Col	P	Ins2d	9	92556.5	0.56257	92556.5	11.4356
90814	CellBind	Neg	Neg	Neg	9	NA	#VALUE!	2	0.693147
90814	CellBind	Pos	Pos	Pos	9	164524	1	164524	12.0108
90814	CellBind	Cont	H	I/D	12	471101	0.800356	471101	13.0628
90814	CellBind	Col	H	I/D	12	62887.9	0.106841	62887.9	11.0491
90814	CellBind	Col	H	I/D	12	85925.7	0.14598	85925.7	11.3612
90814	CellBind	Cont	P	I/D	12	342791	0.58237	342791	12.7449
90814	CellBind	Col	P	I/D	12	124812	0.212044	124812	11.7346
90814	CellBind	Col	P	I/D	12	132764	0.225554	132764	11.7963
90814	CellBind	Cont	H	Ins	12	338917	0.575789	338917	12.7335
90814	CellBind	Col	H	Ins	12	67673.8	0.114972	67673.8	11.1225
90814	CellBind	Col	H	Ins	12	69605	0.118252	69605	11.1506
90814	CellBind	Cont	P	Ins	12	423547	0.719567	423547	12.9564
90814	CellBind	Col	P	Ins	12	127066	0.215874	127066	11.7525
90814	CellBind	Col	P	Ins	12	151009	0.256551	151009	11.9251
90814	CellBind	Cont	H	Ins2d	12	310009	0.526677	310009	12.6444
90814	CellBind	Col	H	Ins2d	12	181806	0.308872	181806	12.1107
90814	CellBind	Col	H	Ins2d	12	210356	0.357375	210356	12.2566
90814	CellBind	Cont	P	Ins2d	12	341819	0.580719	341819	12.742
90814	CellBind	Col	P	Ins2d	12	147407	0.250431	147407	11.901
90814	CellBind	Col	P	Ins2d	12	187083	0.317836	187083	12.1393
90814	CellBind	Neg	Neg	Neg	12	NA	#VALUE!	2	0.693147
90814	CellBind	Pos	Pos	Pos	12	588614	1	588614	13.2855
101014	Regular	Cont	H	I/D	9	57493.5	0.268491	57493.5	10.9594
101014	Regular	Col	H	I/D	9	2361.19	0.0110266	2361.19	7.76692
101014	Regular	Col	H	I/D	9	NA	#VALUE!	2	0.693147
101014	Regular	Cont	P	I/D	9	41732	0.194886	41732	10.639
101014	Regular	Col	P	I/D	9	27456.2	0.128219	27456.2	10.2203
101014	Regular	Col	P	I/D	9	45536.6	0.212653	45536.6	10.7263
101014	Regular	Cont	H	Ins	9	40045.9	0.187012	40045.9	10.5978
101014	Regular	Col	H	Ins	9	NA	#VALUE!	2	0.693147
101014	Regular	Col	H	Ins	9	NA	#VALUE!	2	0.693147
101014	Regular	Cont	P	Ins	9	101975	0.476217	101975	11.5325
101014	Regular	Col	P	Ins	9	27037.1	0.126262	27037.1	10.205
101014	Regular	Col	P	Ins	9	50210.1	0.234478	50210.1	10.824
101014	Regular	Cont	H	Ins2d	9	57924.5	0.270504	57924.5	10.9669
101014	Regular	Col	H	Ins2d	9	21160	0.0988159	21160	9.95987
101014	Regular	Col	H	Ins2d	9	30389.2	0.141916	30389.2	10.3218
101014	Regular	Cont	P	Ins2d	9	111980	0.522939	111980	11.6261
101014	Regular	Col	P	Ins2d	9	82158.8	0.383677	82158.8	11.3164
101014	Regular	Col	P	Ins2d	9	69683.3	0.325417	69683.3	11.1517
101014	Regular	Neg	Neg	Neg	9	NA	#VALUE!	2	0.693147
101014	Regular	Pos	Pos	Pos	9	214135	1	214135	12.2744
101014	Regular	Cont	H	I/D	12	307765	0.478981	307765	12.6371
101014	Regular	Col	H	I/D	12	40888.6	0.0636358	40888.6	10.6186
101014	Regular	Col	H	I/D	12	21580.8	0.0335865	21580.8	9.97956
101014	Regular	Cont	P	I/D	12	142962	0.222495	142962	11.8703
101014	Regular	Col	P	I/D	12	52344.1	0.0814642	52344.1	10.8656
101014	Regular	Col	P	I/D	12	114396	0.178037	114396	11.6474
101014	Regular	Cont	H	Ins	12	220977	0.34391	220977	12.3058
101014	Regular	Col	H	Ins	12	43421	0.067577	43421	10.6787
101014	Regular	Col	H	Ins	12	25779.6	0.0401212	25779.6	10.1573
101014	Regular	Cont	P	Ins	12	216610	0.337114	216610	12.2859
101014	Regular	Col	P	Ins	12	78562.5	0.122268	78562.5	11.2716
101014	Regular	Col	P	Ins	12	152936	0.238017	152936	11.9378
101014	Regular	Cont	H	Ins2d	12	150816	0.234718	150816	11.9238
101014	Regular	Col	H	Ins2d	12	82610.2	0.128568	82610.2	11.3219
101014	Regular	Col	H	Ins2d	12	108141	0.168302	108141	11.5912
101014	Regular	Cont	P	Ins2d	12	314751	0.489854	314751	12.6595
101014	Regular	Col	P	Ins2d	12	229851	0.357721	229851	12.3452
101014	Regular	Col	P	Ins2d	12	227296	0.353745	227296	12.334
101014	Regular	Neg	Neg	Neg	12	NA	#VALUE!	2	0.693147
101014	Regular	Pos	Pos	Pos	12	642542	1	642542	13.3732
101614	Regular	Cont	H	I/D	9	91201.6	0.827207	91201.6	11.4208
101614	Regular	Col	H	I/D	9	NA	#VALUE!	2	0.693147
101614	Regular	Col	H	I/D	9	NA	#VALUE!	2	0.693147
101614	Regular	Cont	P	I/D	9	24203.4	0.219527	24203.4	10.0942
101614	Regular	Col	P	I/D	9	18703.7	0.169644	18703.7	9.83648
101614	Regular	Col	P	I/D	9	19165.3	0.173831	19165.3	9.86086
101614	Regular	Cont	H	Ins	9	70020	0.635088	70020	11.1565
101614	Regular	Col	H	Ins	9	NA	#VALUE!	2	0.693147
101614	Regular	Col	H	Ins	9	NA	#VALUE!	2	0.693147
101614	Regular	Cont	P	Ins	9	57176.9	0.5186	57176.9	10.9539
101614	Regular	Col	P	Ins	9	27381.8	0.248355	27381.8	10.2176
101614	Regular	Col	P	Ins	9	26928.7	0.244246	26928.7	10.2009
101614	Regular	Cont	H	Ins2d	9	31900	0.289336	31900	10.3704
101614	Regular	Col	H	Ins2d	9	10217.3	0.0926717	10217.3	9.23184
101614	Regular	Col	H	Ins2d	9	19165.3	0.173831	19165.3	9.86086
101614	Regular	Cont	P	Ins2d	9	129565	1.17516	129565	11.7719
101614	Regular	Col	P	Ins2d	9	90243.3	0.818515	90243.3	11.4103
101614	Regular	Col	P	Ins2d	9	91201.6	0.827207	91201.6	11.4208
101614	Regular	Neg	Neg	Neg	9	NA	#VALUE!	2	0.693147
101614	Regular	Pos	Pos	Pos	9	110252	1	110252	11.6105
101614	Regular	Cont	H	I/D	12	166334	0.40443	166334	12.0218
101614	Regular	Col	H	I/D	12	5742.64	0.0139629	5742.64	8.65567
101614	Regular	Col	H	I/D	12	19165.3	0.0465993	19165.3	9.86086
101614	Regular	Cont	P	I/D	12	95052	0.231113	95052	11.4622
101614	Regular	Col	P	I/D	12	51278	0.124679	51278	10.845
101614	Regular	Col	P	I/D	12	64948.8	0.157919	64948.8	11.0814
101614	Regular	Cont	H	Ins	12	121846	0.29626	121846	11.7105
101614	Regular	Col	H	Ins	12	6760.5	0.0164378	6760.5	8.81885
101614	Regular	Col	H	Ins	12	1383.61	0.00336417	1383.61	7.23245
101614	Regular	Cont	P	Ins	12	137417	0.334121	137417	11.8308
101614	Regular	Col	P	Ins	12	50373.2	0.12248	50373.2	10.8272
101614	Regular	Col	P	Ins	12	52183.4	0.126881	52183.4	10.8625
101614	Regular	Cont	H	Ins2d	12	97472.9	0.236999	97472.9	11.4873
101614	Regular	Col	H	Ins2d	12	82164.8	0.199779	82164.8	11.3165
101614	Regular	Col	H	Ins2d	12	89764.8	0.218258	89764.8	11.4049
101614	Regular	Cont	P	Ins2d	12	272816	0.663335	272816	12.5166
101614	Regular	Col	P	Ins2d	12	159061	0.386748	159061	11.977
101614	Regular	Col	P	Ins2d	12	193103	0.469519	193103	12.171
101614	Regular	Neg	Neg	Neg	12	NA	#VALUE!	2	0.693147
101614	Regular	Pos	Pos	Pos	12	411279	1	411279	12.927
91214	CellBind	Cont	H	I/D	9	96902.4	0.414446	91201.6	11.4208
91214	CellBind	Col	H	I/D	9	31573.1	0.135036	2	0.693147
91214	CellBind	Col	H	I/D	9	26637.9	0.113929	2	0.693147
91214	CellBind	Cont	P	I/D	9	141667	0.605901	24203.4	10.0942
91214	CellBind	Col	P	I/D	9	60589.4	0.259137	18703.7	9.83648
91214	CellBind	Col	P	I/D	9	66840.9	0.285874	19165.3	9.86086
91214	CellBind	Cont	H	Ins	9	97556.4	0.417243	70020	11.1565
91214	CellBind	Col	H	Ins	9	14768.1	0.0631624	2	0.693147
91214	CellBind	Col	H	Ins	9	21053.1	0.0900427	2	0.693147
91214	CellBind	Cont	P	Ins	9	163984	0.701351	57176.9	10.9539
91214	CellBind	Col	P	Ins	9	53137.3	0.227265	27381.8	10.2176
91214	CellBind	Col	P	Ins	9	78845.4	0.337217	26928.7	10.2009
91214	CellBind	Cont	H	Ins2d	9	87170	0.372821	31900	10.3704
91214	CellBind	Col	H	Ins2d	9	50045.3	0.214041	10217.3	9.23184
91214	CellBind	Col	H	Ins2d	9	51899.7	0.221972	19165.3	9.86086
91214	CellBind	Cont	P	Ins2d	9	128422	0.549255	129565	11.7719
91214	CellBind	Col	P	Ins2d	9	112120	0.47953	90243.3	11.4103
91214	CellBind	Col	P	Ins2d	9	175124	0.748994	91201.6	11.4208
91214	CellBind	Neg	Neg	Neg	9	NA	#VALUE!	2	0.693147
91214	CellBind	Pos	Pos	Pos	9	233812	1	110252	11.6105
91214	CellBind	Cont	H	I/D	12	365679	0.586355	166334	12.0218
91214	CellBind	Col	H	I/D	12	106784	0.171225	5742.64	8.65567
91214	CellBind	Col	H	I/D	12	100836	0.161688	19165.3	9.86086
91214	CellBind	Cont	P	I/D	12	329274	0.52798	95052	11.4622
91214	CellBind	Col	P	I/D	12	181921	0.291705	51278	10.845
91214	CellBind	Col	P	I/D	12	145205	0.232832	64948.8	11.0814
91214	CellBind	Cont	H	Ins	12	337381	0.54098	121846	11.7105
91214	CellBind	Col	H	Ins	12	65587.2	0.105167	6760.5	8.81885
91214	CellBind	Col	H	Ins	12	96249.1	0.154332	1383.61	7.23245
91214	CellBind	Cont	P	Ins	12	436763	0.700335	137417	11.8308
91214	CellBind	Col	P	Ins	12	131878	0.211462	50373.2	10.8272
91214	CellBind	Col	P	Ins	12	147339	0.236254	52183.4	10.8625
91214	CellBind	Cont	H	Ins2d	12	208422	0.334198	97472.9	11.4873
91214	CellBind	Col	H	Ins2d	12	132571	0.212574	82164.8	11.3165
91214	CellBind	Col	H	Ins2d	12	148767	0.238543	89764.8	11.4049
91214	CellBind	Cont	P	Ins2d	12	362461	0.581195	272816	12.5166
91214	CellBind	Col	P	Ins2d	12	253481	0.406449	159061	11.977
91214	CellBind	Col	P	Ins2d	12	297073	0.476347	193103	12.171
91214	CellBind	Neg	Neg	Neg	12	NA	#VALUE!	2	0.693147
91214	CellBind	Pos	Pos	Pos	12	623648	1	411279	12.927
